# Supplementary material for: A multicenter study evaluation of the ClearLLab 10C panels
Source: PubMed Central journal article supplement — Cytometry B Clin Cytom. 2020 Jul 15;100(2):225–34. doi: 10.1002/cyto.b.21935 (PMC8048967; doi:10.1002/cyto.b.21935), 2020-07-15
Supplement: CYTO-100-225-s001.pdf [file CYTO-100-225-s001.pdf]

## Supplemental Information

### LDTs Used on Sites

Within a total of 453 enrolled specimens for accuracy study, 451 results were received from LDTs. There were three (3) subjects where the LDTs were not available from the sites. Below summarized the panels used on sites for generating LDT results.

#### 1. Site 1 - LDT Panels

| FITC                                                               | PE                   | ECD or CF594 | PC5.5       | PC7          | APC     | AA700 | AA750  | BV421     | BV510 |
|--------------------------------------------------------------------|----------------------|--------------|-------------|--------------|---------|-------|--------|-----------|-------|
| <b>ACUTE LEUKEMIA (Initial diagnostic sample only)</b>             |                      |              |             |              |         |       |        |           |       |
| 1. CD34                                                            | CD13                 | CD16+14      | CD117       | HLA-DR       | CD33    | CD7   | CD11b  | CD15      | CD45  |
| 2. CD41+61                                                         | CD71                 | CD14         | CD56        | CD33         | CD36    | CD34  | CD235a | CD64      | CD45  |
| 3. CD58                                                            | CD49f                | CD34         | CD38        | CD19         | CD81    | CD22  | CD10   | CD123     | CD45  |
| 4. cCD3                                                            | CD4                  | CD56         | CD5         | CD2          | CD8     | CD7   | CD38   | CD3       | CD45  |
| 5. nTdT                                                            | cIgM                 | CD3          | cMPO        | CD33         | cCD3    | CD19  | CD20   | cCD79     | CD45  |
| 6. cMslg                                                           | cMslg                | CD3          | cMslg       | CD33         | cMslg   | CD19  | CD20   | cMslg     | CD45  |
| May add:                                                           |                      |              |             |              |         |       |        |           |       |
| 7. CD41+61                                                         | CD71                 | CD14         | CD56        | CD33         | CD36    | CD34  | CD235a | CD64      | CD45  |
| <b>PANCYTOPENIA - BONE MARROW SAMPLES</b>                          |                      |              |             |              |         |       |        |           |       |
| Kappa + CD4                                                        | Lambda + CD8 +       | CD56         | CD5         | CD19         | CD34    | CD7   | CD10   | CD3       | CD45  |
| CD34                                                               | CD13                 | CD16+14      | CD117       | HLA-DR       | CD33    | CD7   | CD11b  | CD15      | CD45  |
| <b>PANCYTOPENIA - PERIPHERAL BLOOD SAMPLES</b>                     |                      |              |             |              |         |       |        |           |       |
| Kappa + CD4 + CD33                                                 | Lambda + CD8 + CD117 | CD56         | CD5         | CD16         | CD34    | CD19  | CD10   | CD3       | CD45  |
| <b>LYMPHOMA - PERIPHERAL BLOOD SCREEN</b>                          |                      |              |             |              |         |       |        |           |       |
| CD45                                                               | CD8 + λ              | CD16+56      | CD3         | CD5          | CD4 + κ | CD7   | CD20   | CD200     | CD19  |
| <b>LYMPHOMA - NON-PERIPHERAL BLOOD SCREEN</b>                      |                      |              |             |              |         |       |        |           |       |
| CD4 + κ                                                            | CD8 + λ              | CD16+56      | CD5         | CD10         | CD103   | CD19  | CD20   | CD3       | CD45  |
| <b>LYMPHOMA REFLEX TUBES - Not done routinely, only if needed.</b> |                      |              |             |              |         |       |        |           |       |
| Kappa                                                              | Lambda               | CD20         | CD11c       | CD10         | CD103   | CD19  | CD43   | CD25      | CD45  |
| nTdT                                                               | CD1a                 | CD16+56      | CD5         | CD2          | CD3     | CD7   | CD4    | CD8       | CD45  |
| cKappa                                                             | cLambda              |              | Drop-in CD5 | Drop-in CD10 |         | CD19  |        |           | CD45  |
| CD94                                                               | CD158a               | CD56         | CD158b      | CD2          | CD158e  | CD7   | CD16   | CD3/64/19 | CD8   |
| <b>PLASMA CELL DYSCRASIAS</b>                                      |                      |              |             |              |         |       |        |           |       |
| cLambda                                                            | CD117                | CD20         | CD138       | CD27         | cKappa  | CD45  | CD38   | CD56      | CD19  |

**2. Site 2 - LDT Panels**

|                                                                                                                                                                                                                                                                                                                                                                                                                                                                                                                                                                                                                                                                                                                                                                                                                                                                                                                                                                                                                                                                                                                                                                                                                                                                                                                                                                                                                                                                                         | 1                            | 2                  | 3                                             | 4       | 5                        | 6     | 7  | 8      | 9   | 10 |                                           | 1    | 2    | 3  | 4    | 5  | 6  | 7 | 8   | 9 | 10 |                            |                    |                    |                                               |             |            |             |             |                   |                |             |              |                    |                |              |             |                 |                      |             |             |                  |             |                  |             |             |             |             |             |                       |            |               |             |                       |            |             |             |                   |            |             |               |                  |             |            |            |                   |                              |             |             |  |         |                   |               |
|-----------------------------------------------------------------------------------------------------------------------------------------------------------------------------------------------------------------------------------------------------------------------------------------------------------------------------------------------------------------------------------------------------------------------------------------------------------------------------------------------------------------------------------------------------------------------------------------------------------------------------------------------------------------------------------------------------------------------------------------------------------------------------------------------------------------------------------------------------------------------------------------------------------------------------------------------------------------------------------------------------------------------------------------------------------------------------------------------------------------------------------------------------------------------------------------------------------------------------------------------------------------------------------------------------------------------------------------------------------------------------------------------------------------------------------------------------------------------------------------|------------------------------|--------------------|-----------------------------------------------|---------|--------------------------|-------|----|--------|-----|----|-------------------------------------------|------|------|----|------|----|----|---|-----|---|----|----------------------------|--------------------|--------------------|-----------------------------------------------|-------------|------------|-------------|-------------|-------------------|----------------|-------------|--------------|--------------------|----------------|--------------|-------------|-----------------|----------------------|-------------|-------------|------------------|-------------|------------------|-------------|-------------|-------------|-------------|-------------|-----------------------|------------|---------------|-------------|-----------------------|------------|-------------|-------------|-------------------|------------|-------------|---------------|------------------|-------------|------------|------------|-------------------|------------------------------|-------------|-------------|--|---------|-------------------|---------------|
| <input type="checkbox"/> <b>D-TS</b>                                                                                                                                                                                                                                                                                                                                                                                                                                                                                                                                                                                                                                                                                                                                                                                                                                                                                                                                                                                                                                                                                                                                                                                                                                                                                                                                                                                                                                                    | 8/K                          | 4/λ                | 5                                             | 20      | 19                       | 10    | 56 | NIR    | 3   | 45 | <input type="checkbox"/> <b>MM</b>        | 38   | 56   | 45 | 138  | 19 | -  | - | NIR | - | -  |                            |                    |                    |                                               |             |            |             |             |                   |                |             |              |                    |                |              |             |                 |                      |             |             |                  |             |                  |             |             |             |             |             |                       |            |               |             |                       |            |             |             |                   |            |             |               |                  |             |            |            |                   |                              |             |             |  |         |                   |               |
| <input type="checkbox"/> <b>MY1</b>                                                                                                                                                                                                                                                                                                                                                                                                                                                                                                                                                                                                                                                                                                                                                                                                                                                                                                                                                                                                                                                                                                                                                                                                                                                                                                                                                                                                                                                     | 64                           | 13                 | -                                             | -       | 16                       | 34    | -  | NIR    | 38  | 45 | <input type="checkbox"/> <b>cK</b>        | 38   | cK   | 45 | -    | 19 | -  | - | NIR | - | -  |                            |                    |                    |                                               |             |            |             |             |                   |                |             |              |                    |                |              |             |                 |                      |             |             |                  |             |                  |             |             |             |             |             |                       |            |               |             |                       |            |             |             |                   |            |             |               |                  |             |            |            |                   |                              |             |             |  |         |                   |               |
| <input type="checkbox"/> <b>MY2</b>                                                                                                                                                                                                                                                                                                                                                                                                                                                                                                                                                                                                                                                                                                                                                                                                                                                                                                                                                                                                                                                                                                                                                                                                                                                                                                                                                                                                                                                     | 15                           | 33                 | 7                                             | -       | 117                      | 34    | -  | HLA-DR | -   | 45 | <input type="checkbox"/> <b>cL</b>        | 38   | cλ   | 45 | -    | 19 | -  | - | NIR | - | -  |                            |                    |                    |                                               |             |            |             |             |                   |                |             |              |                    |                |              |             |                 |                      |             |             |                  |             |                  |             |             |             |             |             |                       |            |               |             |                       |            |             |             |                   |            |             |               |                  |             |            |            |                   |                              |             |             |  |         |                   |               |
| <input type="checkbox"/> <b>Mono</b>                                                                                                                                                                                                                                                                                                                                                                                                                                                                                                                                                                                                                                                                                                                                                                                                                                                                                                                                                                                                                                                                                                                                                                                                                                                                                                                                                                                                                                                    | 36                           | MY4                | 4                                             | -       | 14                       | -     | -  | NIR    | -   | 45 | <input type="checkbox"/> <b>INTRA</b>     | cMPO | 34   | 45 | c79a | c3 | -  | - | NIR | - | -  |                            |                    |                    |                                               |             |            |             |             |                   |                |             |              |                    |                |              |             |                 |                      |             |             |                  |             |                  |             |             |             |             |             |                       |            |               |             |                       |            |             |             |                   |            |             |               |                  |             |            |            |                   |                              |             |             |  |         |                   |               |
| <input type="checkbox"/> <b>LY4</b>                                                                                                                                                                                                                                                                                                                                                                                                                                                                                                                                                                                                                                                                                                                                                                                                                                                                                                                                                                                                                                                                                                                                                                                                                                                                                                                                                                                                                                                     | -                            | 200                | 19                                            | -       | 5                        | -     | -  | NIR    | 49d | 45 | <input type="checkbox"/> <b>TdT Intra</b> | cTdT | s1a  | 45 | s3   | c3 | -  | - | NIR | - | -  |                            |                    |                    |                                               |             |            |             |             |                   |                |             |              |                    |                |              |             |                 |                      |             |             |                  |             |                  |             |             |             |             |             |                       |            |               |             |                       |            |             |             |                   |            |             |               |                  |             |            |            |                   |                              |             |             |  |         |                   |               |
| <input type="checkbox"/> <b>ALPS</b>                                                                                                                                                                                                                                                                                                                                                                                                                                                                                                                                                                                                                                                                                                                                                                                                                                                                                                                                                                                                                                                                                                                                                                                                                                                                                                                                                                                                                                                    | γΔ                           | αβ                 | 8                                             | 4       | -                        | -     | -  | NIR    | 3   | 45 | <input type="checkbox"/> <b>LeukEP</b>    | 41   | 235a | 45 | -    | -  | 34 | - | NIR | - | -  |                            |                    |                    |                                               |             |            |             |             |                   |                |             |              |                    |                |              |             |                 |                      |             |             |                  |             |                  |             |             |             |             |             |                       |            |               |             |                       |            |             |             |                   |            |             |               |                  |             |            |            |                   |                              |             |             |  |         |                   |               |
| <input type="checkbox"/>                                                                                                                                                                                                                                                                                                                                                                                                                                                                                                                                                                                                                                                                                                                                                                                                                                                                                                                                                                                                                                                                                                                                                                                                                                                                                                                                                                                                                                                                |                              |                    |                                               |         |                          |       |    |        |     |    | <input type="checkbox"/> <b>BAL</b>       | 8    | 4    | 45 | 3    | 19 | -  | - | NIR | - | -  |                            |                    |                    |                                               |             |            |             |             |                   |                |             |              |                    |                |              |             |                 |                      |             |             |                  |             |                  |             |             |             |             |             |                       |            |               |             |                       |            |             |             |                   |            |             |               |                  |             |            |            |                   |                              |             |             |  |         |                   |               |
| <input type="checkbox"/>                                                                                                                                                                                                                                                                                                                                                                                                                                                                                                                                                                                                                                                                                                                                                                                                                                                                                                                                                                                                                                                                                                                                                                                                                                                                                                                                                                                                                                                                |                              |                    |                                               |         |                          |       |    |        |     |    | <input type="checkbox"/> <b>HC</b>        | 103  | 11c  | 45 | 25   | 19 | -  | - | NIR | - | -  |                            |                    |                    |                                               |             |            |             |             |                   |                |             |              |                    |                |              |             |                 |                      |             |             |                  |             |                  |             |             |             |             |             |                       |            |               |             |                       |            |             |             |                   |            |             |               |                  |             |            |            |                   |                              |             |             |  |         |                   |               |
| <input type="checkbox"/>                                                                                                                                                                                                                                                                                                                                                                                                                                                                                                                                                                                                                                                                                                                                                                                                                                                                                                                                                                                                                                                                                                                                                                                                                                                                                                                                                                                                                                                                |                              |                    |                                               |         |                          |       |    |        |     |    | <input type="checkbox"/> <b>B-ALL</b>     | 20   | 10   | -  | -    | 19 | 34 | - | NIR | 3 | 45 |                            |                    |                    |                                               |             |            |             |             |                   |                |             |              |                    |                |              |             |                 |                      |             |             |                  |             |                  |             |             |             |             |             |                       |            |               |             |                       |            |             |             |                   |            |             |               |                  |             |            |            |                   |                              |             |             |  |         |                   |               |
| <b>MRD</b>                                                                                                                                                                                                                                                                                                                                                                                                                                                                                                                                                                                                                                                                                                                                                                                                                                                                                                                                                                                                                                                                                                                                                                                                                                                                                                                                                                                                                                                                              | <input type="checkbox"/>     | 3 tubes            | <input type="checkbox"/>                      | 2 tubes | <input type="checkbox"/> | Day 8 |    |        |     |    | <input type="checkbox"/> <b>T6</b>        | 57   | 2    | 7  | 4    | 5  | 56 | - | 8   | 3 | 45 |                            |                    |                    |                                               |             |            |             |             |                   |                |             |              |                    |                |              |             |                 |                      |             |             |                  |             |                  |             |             |             |             |             |                       |            |               |             |                       |            |             |             |                   |            |             |               |                  |             |            |            |                   |                              |             |             |  |         |                   |               |
| <table border="0" style="width:100%"> <tr> <td><b>Abnormal Pop:</b> _____</td> <td><b>% TLC</b> _____</td> <td><b>% TNC</b> _____</td> <td><b>Absolute:</b> ( _____ x10<sup>9</sup>/L)</td> </tr> <tr> <td>CD19: _____</td> <td>CD3: _____</td> <td>CD38: _____</td> <td>CD34: _____</td> </tr> <tr> <td>CD19/Kappa: _____</td> <td>CD3/CD4: _____</td> <td>CD56: _____</td> <td>CD117: _____</td> </tr> <tr> <td>CD19/Lambda: _____</td> <td>CD3/CD8: _____</td> <td>CD138: _____</td> <td>CD33: _____</td> </tr> <tr> <td>CD19/CD5: _____</td> <td>CD4/CD8 Ratio: _____</td> <td>CD19: _____</td> <td>CD64: _____</td> </tr> <tr> <td>CD19/CD10: _____</td> <td>CD56: _____</td> <td>cKappa / cLambda</td> <td>CD13: _____</td> </tr> <tr> <td>CD20: _____</td> <td>CD57: _____</td> <td>cMPO: _____</td> <td>CD16: _____</td> </tr> <tr> <td>CD19/CD5/CD49d: _____</td> <td>CD5: _____</td> <td>cCD79a: _____</td> <td>CD38: _____</td> </tr> <tr> <td>CD19/CD5/CD200: _____</td> <td>CD2: _____</td> <td>cCD3: _____</td> <td>CD15: _____</td> </tr> <tr> <td>CD19/CD11c: _____</td> <td>CD7: _____</td> <td>cTdT: _____</td> <td>HLA-DR: _____</td> </tr> <tr> <td>CD19/CD25: _____</td> <td>CD1a: _____</td> <td>CD4: _____</td> <td>CD7: _____</td> </tr> <tr> <td>CD19/CD103: _____</td> <td>TCR-Gamma/Delta / Alpha/Beta</td> <td>CD36: _____</td> <td>CD45: _____</td> </tr> <tr> <td></td> <td>_____ :</td> <td>(MY4) CD14: _____</td> <td>CD235a: _____</td> </tr> </table> |                              |                    |                                               |         |                          |       |    |        |     |    |                                           |      |      |    |      |    |    |   |     |   |    | <b>Abnormal Pop:</b> _____ | <b>% TLC</b> _____ | <b>% TNC</b> _____ | <b>Absolute:</b> ( _____ x10 <sup>9</sup> /L) | CD19: _____ | CD3: _____ | CD38: _____ | CD34: _____ | CD19/Kappa: _____ | CD3/CD4: _____ | CD56: _____ | CD117: _____ | CD19/Lambda: _____ | CD3/CD8: _____ | CD138: _____ | CD33: _____ | CD19/CD5: _____ | CD4/CD8 Ratio: _____ | CD19: _____ | CD64: _____ | CD19/CD10: _____ | CD56: _____ | cKappa / cLambda | CD13: _____ | CD20: _____ | CD57: _____ | cMPO: _____ | CD16: _____ | CD19/CD5/CD49d: _____ | CD5: _____ | cCD79a: _____ | CD38: _____ | CD19/CD5/CD200: _____ | CD2: _____ | cCD3: _____ | CD15: _____ | CD19/CD11c: _____ | CD7: _____ | cTdT: _____ | HLA-DR: _____ | CD19/CD25: _____ | CD1a: _____ | CD4: _____ | CD7: _____ | CD19/CD103: _____ | TCR-Gamma/Delta / Alpha/Beta | CD36: _____ | CD45: _____ |  | _____ : | (MY4) CD14: _____ | CD235a: _____ |
| <b>Abnormal Pop:</b> _____                                                                                                                                                                                                                                                                                                                                                                                                                                                                                                                                                                                                                                                                                                                                                                                                                                                                                                                                                                                                                                                                                                                                                                                                                                                                                                                                                                                                                                                              | <b>% TLC</b> _____           | <b>% TNC</b> _____ | <b>Absolute:</b> ( _____ x10 <sup>9</sup> /L) |         |                          |       |    |        |     |    |                                           |      |      |    |      |    |    |   |     |   |    |                            |                    |                    |                                               |             |            |             |             |                   |                |             |              |                    |                |              |             |                 |                      |             |             |                  |             |                  |             |             |             |             |             |                       |            |               |             |                       |            |             |             |                   |            |             |               |                  |             |            |            |                   |                              |             |             |  |         |                   |               |
| CD19: _____                                                                                                                                                                                                                                                                                                                                                                                                                                                                                                                                                                                                                                                                                                                                                                                                                                                                                                                                                                                                                                                                                                                                                                                                                                                                                                                                                                                                                                                                             | CD3: _____                   | CD38: _____        | CD34: _____                                   |         |                          |       |    |        |     |    |                                           |      |      |    |      |    |    |   |     |   |    |                            |                    |                    |                                               |             |            |             |             |                   |                |             |              |                    |                |              |             |                 |                      |             |             |                  |             |                  |             |             |             |             |             |                       |            |               |             |                       |            |             |             |                   |            |             |               |                  |             |            |            |                   |                              |             |             |  |         |                   |               |
| CD19/Kappa: _____                                                                                                                                                                                                                                                                                                                                                                                                                                                                                                                                                                                                                                                                                                                                                                                                                                                                                                                                                                                                                                                                                                                                                                                                                                                                                                                                                                                                                                                                       | CD3/CD4: _____               | CD56: _____        | CD117: _____                                  |         |                          |       |    |        |     |    |                                           |      |      |    |      |    |    |   |     |   |    |                            |                    |                    |                                               |             |            |             |             |                   |                |             |              |                    |                |              |             |                 |                      |             |             |                  |             |                  |             |             |             |             |             |                       |            |               |             |                       |            |             |             |                   |            |             |               |                  |             |            |            |                   |                              |             |             |  |         |                   |               |
| CD19/Lambda: _____                                                                                                                                                                                                                                                                                                                                                                                                                                                                                                                                                                                                                                                                                                                                                                                                                                                                                                                                                                                                                                                                                                                                                                                                                                                                                                                                                                                                                                                                      | CD3/CD8: _____               | CD138: _____       | CD33: _____                                   |         |                          |       |    |        |     |    |                                           |      |      |    |      |    |    |   |     |   |    |                            |                    |                    |                                               |             |            |             |             |                   |                |             |              |                    |                |              |             |                 |                      |             |             |                  |             |                  |             |             |             |             |             |                       |            |               |             |                       |            |             |             |                   |            |             |               |                  |             |            |            |                   |                              |             |             |  |         |                   |               |
| CD19/CD5: _____                                                                                                                                                                                                                                                                                                                                                                                                                                                                                                                                                                                                                                                                                                                                                                                                                                                                                                                                                                                                                                                                                                                                                                                                                                                                                                                                                                                                                                                                         | CD4/CD8 Ratio: _____         | CD19: _____        | CD64: _____                                   |         |                          |       |    |        |     |    |                                           |      |      |    |      |    |    |   |     |   |    |                            |                    |                    |                                               |             |            |             |             |                   |                |             |              |                    |                |              |             |                 |                      |             |             |                  |             |                  |             |             |             |             |             |                       |            |               |             |                       |            |             |             |                   |            |             |               |                  |             |            |            |                   |                              |             |             |  |         |                   |               |
| CD19/CD10: _____                                                                                                                                                                                                                                                                                                                                                                                                                                                                                                                                                                                                                                                                                                                                                                                                                                                                                                                                                                                                                                                                                                                                                                                                                                                                                                                                                                                                                                                                        | CD56: _____                  | cKappa / cLambda   | CD13: _____                                   |         |                          |       |    |        |     |    |                                           |      |      |    |      |    |    |   |     |   |    |                            |                    |                    |                                               |             |            |             |             |                   |                |             |              |                    |                |              |             |                 |                      |             |             |                  |             |                  |             |             |             |             |             |                       |            |               |             |                       |            |             |             |                   |            |             |               |                  |             |            |            |                   |                              |             |             |  |         |                   |               |
| CD20: _____                                                                                                                                                                                                                                                                                                                                                                                                                                                                                                                                                                                                                                                                                                                                                                                                                                                                                                                                                                                                                                                                                                                                                                                                                                                                                                                                                                                                                                                                             | CD57: _____                  | cMPO: _____        | CD16: _____                                   |         |                          |       |    |        |     |    |                                           |      |      |    |      |    |    |   |     |   |    |                            |                    |                    |                                               |             |            |             |             |                   |                |             |              |                    |                |              |             |                 |                      |             |             |                  |             |                  |             |             |             |             |             |                       |            |               |             |                       |            |             |             |                   |            |             |               |                  |             |            |            |                   |                              |             |             |  |         |                   |               |
| CD19/CD5/CD49d: _____                                                                                                                                                                                                                                                                                                                                                                                                                                                                                                                                                                                                                                                                                                                                                                                                                                                                                                                                                                                                                                                                                                                                                                                                                                                                                                                                                                                                                                                                   | CD5: _____                   | cCD79a: _____      | CD38: _____                                   |         |                          |       |    |        |     |    |                                           |      |      |    |      |    |    |   |     |   |    |                            |                    |                    |                                               |             |            |             |             |                   |                |             |              |                    |                |              |             |                 |                      |             |             |                  |             |                  |             |             |             |             |             |                       |            |               |             |                       |            |             |             |                   |            |             |               |                  |             |            |            |                   |                              |             |             |  |         |                   |               |
| CD19/CD5/CD200: _____                                                                                                                                                                                                                                                                                                                                                                                                                                                                                                                                                                                                                                                                                                                                                                                                                                                                                                                                                                                                                                                                                                                                                                                                                                                                                                                                                                                                                                                                   | CD2: _____                   | cCD3: _____        | CD15: _____                                   |         |                          |       |    |        |     |    |                                           |      |      |    |      |    |    |   |     |   |    |                            |                    |                    |                                               |             |            |             |             |                   |                |             |              |                    |                |              |             |                 |                      |             |             |                  |             |                  |             |             |             |             |             |                       |            |               |             |                       |            |             |             |                   |            |             |               |                  |             |            |            |                   |                              |             |             |  |         |                   |               |
| CD19/CD11c: _____                                                                                                                                                                                                                                                                                                                                                                                                                                                                                                                                                                                                                                                                                                                                                                                                                                                                                                                                                                                                                                                                                                                                                                                                                                                                                                                                                                                                                                                                       | CD7: _____                   | cTdT: _____        | HLA-DR: _____                                 |         |                          |       |    |        |     |    |                                           |      |      |    |      |    |    |   |     |   |    |                            |                    |                    |                                               |             |            |             |             |                   |                |             |              |                    |                |              |             |                 |                      |             |             |                  |             |                  |             |             |             |             |             |                       |            |               |             |                       |            |             |             |                   |            |             |               |                  |             |            |            |                   |                              |             |             |  |         |                   |               |
| CD19/CD25: _____                                                                                                                                                                                                                                                                                                                                                                                                                                                                                                                                                                                                                                                                                                                                                                                                                                                                                                                                                                                                                                                                                                                                                                                                                                                                                                                                                                                                                                                                        | CD1a: _____                  | CD4: _____         | CD7: _____                                    |         |                          |       |    |        |     |    |                                           |      |      |    |      |    |    |   |     |   |    |                            |                    |                    |                                               |             |            |             |             |                   |                |             |              |                    |                |              |             |                 |                      |             |             |                  |             |                  |             |             |             |             |             |                       |            |               |             |                       |            |             |             |                   |            |             |               |                  |             |            |            |                   |                              |             |             |  |         |                   |               |
| CD19/CD103: _____                                                                                                                                                                                                                                                                                                                                                                                                                                                                                                                                                                                                                                                                                                                                                                                                                                                                                                                                                                                                                                                                                                                                                                                                                                                                                                                                                                                                                                                                       | TCR-Gamma/Delta / Alpha/Beta | CD36: _____        | CD45: _____                                   |         |                          |       |    |        |     |    |                                           |      |      |    |      |    |    |   |     |   |    |                            |                    |                    |                                               |             |            |             |             |                   |                |             |              |                    |                |              |             |                 |                      |             |             |                  |             |                  |             |             |             |             |             |                       |            |               |             |                       |            |             |             |                   |            |             |               |                  |             |            |            |                   |                              |             |             |  |         |                   |               |
|                                                                                                                                                                                                                                                                                                                                                                                                                                                                                                                                                                                                                                                                                                                                                                                                                                                                                                                                                                                                                                                                                                                                                                                                                                                                                                                                                                                                                                                                                         | _____ :                      | (MY4) CD14: _____  | CD235a: _____                                 |         |                          |       |    |        |     |    |                                           |      |      |    |      |    |    |   |     |   |    |                            |                    |                    |                                               |             |            |             |             |                   |                |             |              |                    |                |              |             |                 |                      |             |             |                  |             |                  |             |             |             |             |             |                       |            |               |             |                       |            |             |             |                   |            |             |               |                  |             |            |            |                   |                              |             |             |  |         |                   |               |



4. Site 4 - LDT Panels

| # | Name     | FITC  | PE     | ECD | PC5.5 | PC7 | APC | APCA 700 | APCA 750 | PB or V450 | KO |
|---|----------|-------|--------|-----|-------|-----|-----|----------|----------|------------|----|
| 1 | T-Cell   | 38    | 56     | 3   | 5     | 7   | 2   | 19       | 4        | 8          | 45 |
| 2 | B-Cell   | Kappa | Lambda | 23  | 19    | 11c | 10  | 5        | 34       | 20         | 45 |
| 3 | Myeloid  | 16    | 13     | 64  | 117   | 33  | 34  | 19       | 14       | HLA-DR     | 45 |
| 4 | Extended | FMC-7 | 235a   | 41  | 138   | 11b | 34  | 19       | 71       | 15         | 45 |

AML Add-on Tube

| Name | FITC        | PE          | ECD | PC5.5 | PC7 | APC  | APCA 700 | APCA 750 | PB  | KO |
|------|-------------|-------------|-----|-------|-----|------|----------|----------|-----|----|
| AML  | <u>nTdt</u> | <u>cMPO</u> | 34  | 117   | c22 | c79a | 123      | c3       | 11b | 45 |

B-ALL Add-on Tube

| Name  | FITC        | PE          | ECD | PC5.5 | PC7 | APC  | APCA 700 | APCA 750 | PB   | KO |
|-------|-------------|-------------|-----|-------|-----|------|----------|----------|------|----|
| B-ALL | <u>nTdt</u> | <u>cMPO</u> | 19  | c22   | 10  | c79a | 34       | c3       | none | 45 |

CLL/Mantle Cell Companion Add-on Panel

| Name | FITC | PE  | ECD | PC5.5 | PC7  | APC | APCA 700 | APCA 750 | PB    | KO |
|------|------|-----|-----|-------|------|-----|----------|----------|-------|----|
| CLL  | 43   | 200 | 3   | 22    | none | 36  | none     | none     | FMC-7 | 45 |

Erythroid/Megakaryocyte Panel

| Name              | FITC | PE | ECD | PC5.5 | PC7 | APC  | APCA 700 | APCA 750 | PB   | KO |
|-------------------|------|----|-----|-------|-----|------|----------|----------|------|----|
| <u>Eryth-Mega</u> | 71   | 13 | c41 | 117   | c61 | none | 34       | 235a     | none | 45 |

Hairy Cell Add-on Tube

| Name       | FITC  | PE     | ECD | PC5.5 | PC7 | APC | APCA 700 | APCA 750 | PB   | KO |
|------------|-------|--------|-----|-------|-----|-----|----------|----------|------|----|
| Hairy Cell | Kappa | Lambda | 19  | 22    | 11c | 103 | 25       | 20       | none | 45 |

Intracytoplasmic B-cell Tube

| Name      | FITC          | PE             | ECD | PC5.5 | PC7 | APC | APCA 700 | APCA 750 | V450 | KO |
|-----------|---------------|----------------|-----|-------|-----|-----|----------|----------|------|----|
| IC B-cell | <u>cKappa</u> | <u>cLambda</u> | 23  | 19    | 11c | 10  | 5        | 34       | 20   | 45 |

MDS Add-on Panel

| Name | FITC | PE | ECD | PC5.5 | PC7 | APC | APCA 700 | APCA 750 | PB   | KO |
|------|------|----|-----|-------|-----|-----|----------|----------|------|----|
| MDS  | 71   | 13 | 41  | 117   | 11b | 36  | none     | 235a     | none | 45 |

Plasma Cell Add-on Panel

| Name         | FITC          | PE             | ECD | PC5.5 | PC7 | APC | APCA 700 | APCA 750 | PB | KO   |
|--------------|---------------|----------------|-----|-------|-----|-----|----------|----------|----|------|
| 9-Color ICPC | <u>cKappa</u> | <u>cLambda</u> | 20  | 38    | 56  | 138 | 19       | 117      | 45 | none |

T-ALL Add-on Tube/Immature T-cell

| Name  | FITC        | PE | ECD | PC5.5       | PC7 | APC  | APCA 700 | APCA 750 | PB  | KO |
|-------|-------------|----|-----|-------------|-----|------|----------|----------|-----|----|
| T-ALL | <u>nTdt</u> | 1a | c3  | <u>cMPO</u> | 7   | none | 19       | 43       | 11b | 45 |

T-cell Receptor/LGL Add-on Panel

| Name   | FITC    | PE      | ECD | PC5.5 | PC7 | APC | APCA 700 | APCA 750 | PB | KO |
|--------|---------|---------|-----|-------|-----|-----|----------|----------|----|----|
| T-cell | TCR a/b | TCR g/d | 16  | 3     | 56  | 7   | 8        | 4        | 57 | 45 |

T-Cell Therapy Panel

| Name           | FITC | PE | ECD | PC5.5 | PC7 | APC | APCA 700 | APCA 750 | PB | KO |
|----------------|------|----|-----|-------|-----|-----|----------|----------|----|----|
| T-cell Therapy | 52   | 26 | 3   | 279   | 7   | 30  | 25       | 4        | 8  | 45 |
